# Supplementary material for: High-throughput Chemical Screening Identifies Focal Adhesion Kinase and Aurora Kinase B Inhibition as a Synergistic Treatment Combination in Ewing Sarcoma
Source: Oxford University Press journal article supplement (doi:10.1158/1078-0432.ccr-17-0375), 2019-04-12
Supplement: 10780432ccr170375-sup-178619_3_supp_5438251_ppczhz.xlsx [file 10780432ccr170375-sup-178619_3_supp_5438251_ppczhz.xlsx]

## Sheet: Sheet1
Supplemental Table S3. Target sequences for shRNAs targeting AURKB expression in the in vivo dependency screen
AURKB target sequences
CAGCGAGTCCTCCGGAAAGAG
CATCGTCAAGGTGGACCTAAA
GAAGAGCTGCACATTTGACGA
CCATCTGCACTTGTCCTCATG
CCTGCGTCTCTACAACTATT
CTACCTCCTCCTTTGTTTAAT
TTAACGCGGCACTTCACAATT
