# Supplementary material for: High-throughput Chemical Screening Identifies Focal Adhesion Kinase and Aurora Kinase B Inhibition as a Synergistic Treatment Combination in Ewing Sarcoma
Source: Oxford University Press journal article supplement (doi:10.1158/1078-0432.ccr-17-0375), 2019-04-12
Supplement: 10780432ccr170375-sup-178619_3_supp_5438253_ppcmhm.xlsx [file 10780432ccr170375-sup-178619_3_supp_5438253_ppcmhm.xlsx]

## Sheet: Sheet1
Supplemental Table S4. Target sequences for sgRNA guides targeting AURKB, AURKA, and FAK genes
shRNA	Target Sequence
sgCtr	GTAGCGAACGTGTCCGGCGT
sgAKB3	CCAAACTTGCCTTTGCCCAG
sgAKB5	TGACGAGCAGCGAACAGCCA
sgAKA3	GCTAGTTTACCAGGTGCCGA
sgFAK6	CCCCTTACCTGACACAGAGA
sgFAK9	GGAGCTGTGCACACTTGGAG
