# Supplementary material for: High-throughput Chemical Screening Identifies Focal Adhesion Kinase and Aurora Kinase B Inhibition as a Synergistic Treatment Combination in Ewing Sarcoma
Source: Oxford University Press journal article supplement (doi:10.1158/1078-0432.ccr-17-0375), 2019-04-12
Supplement: 10780432ccr170375-sup-178619_3_supp_5438254_ppc1h1.xlsx [file 10780432ccr170375-sup-178619_3_supp_5438254_ppc1h1.xlsx]

## Sheet: Sheet1
Supplemental Table S5. Target sequences for shRNAs targeting AURKB and EWS/FLI expression
shRNA	Catalog No.	Target Sequence
shCtr	RHS4743	ATCTCGCTTGGGCGAGAGTAAG
shAURKB8	V3THS_341839	TCAAGTAGATCCTCCTCCG
shAURKB9	V3THS_341840	AGAGCATCTGCCAACTCCT
shAURKB10	V3THS_341836	ATGTCTCTGTGAATCACCT
shE/F-6	V2THS_227524	AATTTATACAGTAAGTTGC
shE/F-7	V3THS_414176	TAAACACACAAACCTTCTT
