# Supplementary material for: High-throughput Chemical Screening Identifies Focal Adhesion Kinase and Aurora Kinase B Inhibition as a Synergistic Treatment Combination in Ewing Sarcoma
Source: Oxford University Press journal article supplement (doi:10.1158/1078-0432.ccr-17-0375), 2019-04-12
Supplement: 10780432ccr170375-sup-178619_3_supp_5438255_ppcjhj.xlsx [file 10780432ccr170375-sup-178619_3_supp_5438255_ppcjhj.xlsx]

## Sheet: Sheet1
Supplemental Table S7. Reverse Phase Protein Array (RPPA) data. Total protein and phosphorylation levels in untreated and treated A673 and TC32 cells are normalized to total protein levels in each sample.
	A673										TC32
Antibody Target	DMSO	PF-562271	VS-4718	AZD-1152	GSK-1070916	PF + AZD	PF + GSK	VS + AZD	VS + GSK		DMSO	PF-562271	VS-4718	AZD-1152	GSK-1070916	PF + AZD	PF + GSK	VS + AZD	VS + GSK
14-3-3-beta	1.12464	1.05276	1.02579	0.977303	1.03364	1.01691	1.03493	0.973071	0.984877		0.939293	0.951819	0.799488	1.09018	1.04522	1.04761	1.03152	0.9865	1.04786
14-3-3-epsilon	0.95087	1.02498	0.962824	0.900056	0.933963	0.977463	0.987357	1.04983	1.09952		0.955327	1.0999	1.12359	0.943045	0.933177	0.920754	0.894749	0.901157	0.943148
14-3-3-zeta	0.714902	0.762321	0.684892	0.680678	0.716997	0.786835	0.812836	0.815118	0.850165		1.23539	1.27546	1.02977	1.48856	1.35808	1.36173	1.39919	1.31293	1.31206
4E-BP1	0.889527	1.13063	1.08091	1.18158	0.500358	1.2607	1.13599	1.12624	1.11081		0.900151	0.807396	0.825948	0.804399	0.77282	0.85858	1.0076	0.938725	0.899819
4E-BP1 pS65	1.66782	1.10484	1.29437	1.51651	1.47349	1.03889	1.02979	1.00472	1.11069		1.31021	0.890059	1.00365	1.08243	0.895543	0.749855	0.772068	0.90032	0.873273
53BP1	1.04976	0.900155	1.02281	1.02375	0.912884	0.877378	0.878467	0.97154	0.989406		1.16042	1.15701	1.37051	1.03413	1.27734	1.20065	1.23647	1.32219	1.49196
A-Raf	0.855441	0.859252	0.839377	0.959041	0.845325	1.02708	0.88783	0.957153	0.962545		1.10177	1.25606	1.09619	1.15133	1.1041	1.25274	1.26529	1.05767	1.09597
ACC1	0.83603	0.797345	0.860377	0.808262	0.861989	0.919915	0.893445	0.962096	0.967875		1.48508	1.38879	1.31181	1.176	1.03429	1.12125	1.1779	1.12884	1.04363
ACC pS79	0.949901	0.954206	0.975653	0.909824	0.98428	0.991007	1.03769	0.991131	1.0648		1.11163	1.0762	1.11951	1.08724	1.08451	1.09616	1.09911	1.09773	1.12178
ADAR1	0.96575	0.917528	0.980065	0.997822	1.00162	0.98252	0.891212	1.04043	1.2092		1.74606	1.91378	2.16453	1.09358	1.36078	1.22711	1.32357	1.38452	1.23881
Akt	0.878532	1.03751	0.975867	0.972788	0.900344	0.931185	1.00258	0.977079	0.903135		1.36895	1.51622	1.52665	0.939057	1.28784	1.44999	1.5591	1.30686	1.4064
Akt pS473	0.999445	0.986478	1.04943	0.988142	1.06323	1.02184	1.04591	0.999304	0.955135		0.890766	0.989465	0.783556	0.864485	1.03196	1.18815	1.10302	1.10685	1.12763
Akt pT308	1.02185	1.0085	1.08722	0.975196	0.987235	1.0379	1.01154	1.04094	1.08967		0.993744	0.958724	0.967426	1.07531	1.14206	0.950295	1.09003	1.11468	1.21161
AMPK-a2 pS345	1.05661	1.00005	1.01236	1.01106	1.06385	1.06373	0.992497	1.01254	1.01298		0.966959	0.967071	0.951871	1.06921	1.06383	1.03538	1.00464	1.05794	1.06595
AMPKa	1.00381	0.990364	0.972234	0.97172	0.972849	0.987403	0.982216	1.05599	1.007		1.02454	1.13959	1.03029	1.07721	1.05801	1.05339	1.06754	1.06392	1.05367
AMPKa pT172	0.803645	0.620065	0.823385	0.924339	0.756656	0.761677	0.777868	0.827691	0.735904		1.03711	1.04987	1.16133	1.19446	1.12255	1.21251	1.1716	0.96928	1.03671
Annexin-I	1.19354	1.20628	1.20901	1.10233	1.0701	1.15392	1.15961	1.11179	1.23735		0.772857	0.752413	0.688201	0.891865	0.895457	0.761943	0.800527	0.619357	0.672604
Annexin-VII	0.960182	1.01967	1.05245	0.973019	0.96488	1.10741	0.947505	1.02848	1.02304		0.999265	1.13303	1.06341	1.08292	1.177	1.21813	1.18055	1.00756	1.11013
AR	1.08906	0.92785	1.03621	1.10619	0.978182	0.921236	1.00507	0.955426	1.02127		1.02517	0.939691	0.95818	0.989901	0.96169	0.981968	0.974971	0.99942	0.940903
ARID1A	1.19709	1.10564	1.3879	1.23251	0.880166	0.993241	0.942139	0.989893	0.932741		0.824208	0.799964	1.04187	0.526448	0.947397	0.915022	0.883072	0.865173	0.929412
Atg3	1.05922	1.06472	0.994568	1.00928	0.949928	1.02089	0.924794	0.970327	0.961876		1.02979	0.925311	0.964205	1.09701	1.03547	1.09497	1.05681	1.03045	1.0689
Atg7	1.05564	0.984823	0.952519	0.938892	0.876186	0.960135	0.930707	1.11351	1.02972		0.998099	0.998006	1.13949	0.848521	1.05163	0.935275	0.939252	1.00849	1.08893
ATM	1.01513	1.00939	1.1646	1.08493	1.05187	1.09326	1.03055	1.2711	1.20934		0.825875	0.907726	1.01025	0.789452	0.860281	0.929671	0.975062	1.08438	1.10211
ATM pS1981	0.979564	0.998158	0.990351	0.999194	1.04867	1.02519	0.977832	1.04089	1.07229		1.01493	1.01092	0.93792	1.04243	1.04811	1.00514	0.999811	1.054	1.11095
ATRX	1.04855	0.935794	0.86554	0.988447	0.918564	1.04007	1.0444	0.972183	1.01854		0.969006	1.08538	1.19156	0.827119	1.04777	1.20974	1.20338	1.27869	1.18238
ATR pS428	1.0885	1.02384	0.998459	1.1027	1.13466	0.717312	0.971764	0.852455	0.826364		0.912186	0.87617	0.96882	1.01591	0.868533	0.916368	0.910502	0.977287	0.970196
Aurora-B	1.46124	1.11114	1.01716	1.46177	1.31586	0.985699	1.02819	0.862846	0.872941		1.14421	0.922057	1.04435	1.01991	0.809047	0.892381	0.863911	1.11556	0.917755
Axl	1.07506	0.724889	0.635988	0.893869	0.850546	0.638228	0.59484	0.628948	0.628215		1.00459	1.10523	0.839453	1.37616	1.89995	1.27404	1.2428	1.1726	1.45882
b-Actin	1.60077	1.67154	1.30682	1.81051	1.71157	1.48934	1.49761	1.23562	1.2409		0.875514	0.821457	0.723966	0.661575	0.800558	0.81634	0.829224	0.796921	0.809111
b-Catenin	1.39939	1.23946	1.46817	1.37348	1.31862	1.0705	1.20839	1.3839	1.25375		0.820964	0.780371	0.839651	0.862663	0.802366	0.754196	0.780697	0.840116	0.901704
b-Catenin pT41 S45	1.01907	1.0103	1.02743	1.04194	1.03264	0.958555	0.983592	0.987918	0.916098		0.945902	0.96541	0.886457	1.02981	1.00916	1.02435	0.978322	0.994793	1.02748
B-Raf	1.03141	1.00206	1.02571	0.988751	1.05735	1.01528	1.00831	0.990772	1.00142		1.10786	1.09685	1.06248	1.06421	1.05449	1.0303	1.06578	1.08735	1.09822
B-Raf pS445	0.788696	0.861558	0.903477	0.841944	0.853015	0.892606	0.908878	0.912225	0.890001		1.13565	1.29271	1.31756	1.22391	1.13319	1.23312	1.2865	1.33904	1.32879
B7-H4	1.04887	1.00273	1.0003	0.972779	1.0113	1.08388	0.961711	1.06699	1.03152		0.919649	0.93104	0.905231	1.10141	1.10421	1.05855	1.0068	1.03456	1.14187
Bad pS112	0.942408	0.97851	0.957897	1.0191	1.02003	1.03394	1.02396	0.903604	0.900807		0.919808	1.06548	0.940139	0.949318	0.914503	1.0199	1.01147	0.964006	0.933577
Bak	1.02283	0.952418	1.05924	1.01315	1.02685	1.0231	1.02302	1.0305	1.04666		1.21371	1.25732	1.17562	1.09282	1.073	1.23256	1.20468	1.12517	1.11402
BAP1	0.995871	0.942768	0.988161	0.994948	0.939131	0.851708	0.952355	1.05743	1.18869		1.67515	1.79559	2.21228	1.06233	1.09664	1.05455	1.11961	1.0862	1.10077
Bax	0.770463	0.730385	0.742499	0.724106	0.760146	0.715572	0.71135	0.765715	0.784565		1.11104	1.22098	1.08647	1.45554	1.3523	1.31507	1.21041	1.32198	1.27627
Bcl-xL	0.975181	0.969365	1.00346	0.923976	0.938943	0.904149	1.00923	0.988389	0.999803		1.07892	1.06231	1.02303	1.11744	0.969552	0.973758	1.0593	1.11418	1.06119
Bcl2	0.901714	0.934397	1.04238	0.828135	0.881377	0.876475	0.844321	1.06173	1.15901		1.00046	1.09208	1.44173	1.01434	0.994568	0.947805	0.890485	1.17819	1.14763
Bcl2A1	0.951163	0.947549	0.951068	0.978512	0.952976	1.06684	0.98061	1.03774	0.994587		1.06505	1.07342	0.968552	1.09642	1.01661	1.08104	1.08611	1.06	1.11538
Beclin-G-C	0.840139	0.876846	0.795902	0.832008	0.886796	0.97618	1.02566	1.01416	1.06692		1.25756	1.35026	1.28201	1.10001	1.06057	1.0168	1.05382	1.1168	1.1859
Bid	0.993554	1.01436	1.01699	0.950939	1.06398	1.02162	1.10655	1.00754	1.02396		0.872642	0.891992	0.866003	0.932633	0.927618	0.952032	0.97976	1.03156	1.00086
Bim	0.90962	0.954949	0.994458	0.848657	0.922992	0.999816	0.976712	0.996626	1.046		1.20615	1.19101	1.26004	1.13967	1.14205	1.21519	1.18853	1.33772	1.36324
BiP-GRP78	0.354468	0.984769	0.846294	0.958447	1.00705	1.23258	1.02262	1.04861	1.08068		0.9438	0.996549	0.993604	0.931768	0.933918	0.896261	0.902903	0.870379	0.944141
BRD4	0.989423	0.810029	1.16499	1.06386	0.872279	0.866371	0.877773	0.983977	0.977207		0.950999	0.916661	1.06768	0.781192	1.24978	1.1978	1.20137	1.17291	1.27775
c-Abl	1.03235	1.06173	1.0738	1.10829	1.03701	1.11569	1.09341	1.04826	0.986965		0.853322	0.777266	0.754076	0.942016	0.887143	0.942352	0.955249	0.896217	0.932748
c-IAP2	1.02107	1.11093	1.01472	0.963986	1.01433	1.04725	1.03432	1.03681	1.063		0.947576	0.956405	1.06312	1.05614	1.13491	1.13857	1.14355	1.16711	1.21011
c-Jun pS73	1.20057	1.04769	1.02295	1.18529	1.23617	0.967119	0.912774	0.919524	0.940615		0.983251	0.922219	1.0128	0.873599	0.949394	0.880648	0.793378	1.01357	0.975125
c-Kit	0.744661	0.667892	0.777987	0.769361	0.791784	0.689879	0.689889	0.746442	0.729393		1.88489	1.43937	2.02406	1.3564	1.39542	1.24887	1.35638	1.66844	1.67865
c-Met-M-Q	1.04097	1.01184	1.02271	0.938309	0.991991	0.982472	0.980029	1.01806	0.983316		1.03491	1.19741	1.21513	1.09153	1.08313	1.10557	1.06287	1.02878	1.05454
c-Met pY1234 Y1235	1.14978	1.01267	0.806143	1.07416	1.12314	1.04097	0.997635	0.80006	0.870484		0.947013	0.963141	0.785237	0.944591	1.0038	0.933427	0.933946	0.863955	0.874075
c-Myc	1.59559	0.995843	1.1343	1.3945	1.24569	0.869073	0.845619	0.786668	0.828669		0.978996	0.802725	0.73693	1.02033	0.936167	0.974508	0.864717	0.930789	0.84506
C-Raf	1.06096	1.05592	1.08812	1.13388	1.04146	0.97601	1.01744	1.03902	0.932187		1.02336	0.96623	0.998729	0.803587	0.995566	0.92676	0.947189	0.988517	0.915036
C-Raf pS338	1.09815	0.940318	1.03531	1.04179	1.08153	0.986521	0.971876	0.928547	0.958575		0.902116	0.925515	0.89081	1.00609	0.961964	0.93241	0.888228	0.919723	0.912296
Caspase-3	0.889901	0.960386	0.975591	1.00082	1.04848	1.14068	1.20826	1.53212	1.57305		0.892152	0.866175	0.872401	0.904554	0.862977	0.889616	0.854146	0.958399	0.932556
Caspase-7-cleaved	0.489617	1.12326	0.96451	1.17247	1.27298	1.93522	2.02472	2.85263	2.83112		0.466531	0.61313	0.551358	0.60348	0.629425	0.714104	0.6782	0.974885	1
Caspase-8-M-Q	1.02394	1.04007	1.03581	1.08047	1.00201	1.01227	0.762907	1.01031	0.954334		0.899481	0.890741	0.950392	1.02608	0.997368	0.966438	0.946088	0.887437	0.960148
Caveolin-1	1.08869	1.13784	1.03729	1.12077	0.687497	0.987173	0.976615	1.10654	0.959744		1.02193	1.07259	0.932795	0.896126	0.895479	0.928379	0.958935	0.690045	0.814722
CD171	0.813443	0.9955	0.754726	0.761066	0.979356	0.852491	0.854534	0.811427	0.887205		1.0029	1.11837	1.22316	1.26048	1.31925	0.985214	0.950515	0.94152	0.927724
CD26	1.03647	1.00936	1.05511	1.0002	1.04975	0.932727	0.963099	0.984775	1.00365		1.02744	1.04004	0.903286	0.934472	1.02002	1.01541	1.06617	0.994407	1.02123
CD31	0.938604	0.92	0.947802	0.903301	0.914875	1.00202	0.981785	1.08979	1.16995		1.11764	1.34894	1.4402	1.03767	1.01434	1.04904	1.00609	1.01519	1.19275
CD44	0.957639	0.940969	0.897442	0.878743	0.887871	1.06728	0.783339	0.907707	0.935264		1.10677	1.01665	1.09982	1.39142	1.39218	1.34606	1.33153	1.25769	1.24565
CD49b	0.942516	0.930178	0.920153	0.943262	0.932175	1.13727	0.8843	0.929826	0.955407		1.02018	1.07021	1.21027	1.08322	1.1352	1.06096	1.13121	1.05265	1.13962
cdc25C	1.17609	1.17843	0.786228	1.11538	1.04633	1.07603	1.03448	0.862106	0.870083		1.01959	0.911693	1.05159	1.04786	0.790836	0.937198	0.931354	0.892203	0.840809
Cdc2 pY15	1.22786	1.07034	1.10849	1.07991	1.06133	0.760602	0.933992	0.790154	0.770127		1.13345	0.955446	1.1249	0.945722	0.672484	0.889403	0.872543	0.952451	0.816586
CDK1	1.44997	1.37036	1.65281	1.57127	1.21324	1.16357	1.42597	1.07262	0.952399		0.849329	0.725584	1.23132	0.619658	0.429899	0.631923	0.675423	0.745302	0.669624
Chk1 pS296	1.28739	0.998479	0.823553	1.07671	1.19465	1.35133	1.41789	0.753745	0.750179		0.910619	0.776052	0.762675	0.951727	0.767503	0.939722	1.22162	0.848745	0.847009
Chk2 pT68	0.933612	1.01339	0.981094	1.03813	1.16689	0.97738	0.933056	0.99082	0.978797		0.842583	0.964757	0.882632	0.922969	0.895641	0.935152	0.928592	1.1333	1.09548
Claudin-7	0.962323	0.9461	0.959423	0.975397	1.06138	1.06152	1.01969	0.991197	0.996705		1.07885	1.06582	1.02785	1.06663	1.10864	1.08295	1.1013	1.15657	1.1814
COG3	0.9613	1.09184	0.963204	1.02411	1.01665	0.39785	1.08121	1.02745	0.987621		0.926995	0.835673	0.977203	1.00283	1.13752	1.1689	1.20189	1.13006	0.360384
Collagen-VI	0.959005	0.987423	1.07736	1.03385	1.00054	0.975072	1.06088	1.02609	1.10395		0.947499	1.04704	0.994694	0.947943	0.860457	0.973818	0.890098	0.902471	0.892833
Connexin-43	2.21701	1.6183	1.65308	2.64919	1.89757	1.4334	1.35227	1.50995	1.4911		0.536351	0.429719	0.393059	0.697489	0.712297	0.512124	0.509162	0.454344	0.439262
Cox-IV	0.898889	1.04352	1.01135	1.01047	0.923084	1.04131	1.10633	1.04148	1.08884		0.890441	1.05235	1.23402	0.952254	0.85333	0.972466	0.951965	0.873885	0.893474
Cox2	1.06085	1.04937	0.954969	1.04811	0.985136	1.02569	1.03246	0.968546	1.02422		0.902598	0.968138	0.922811	0.869722	0.85576	0.974908	0.910817	0.866032	0.903656
Creb	0.938087	0.964938	0.961137	0.929529	1.04469	1.02548	1.03609	0.995943	1.07758		1.03378	1.05688	1.04702	0.976673	1.05263	1.04372	1.03543	1.08018	1.09158
Cyclin-B1	1.30148	1.2438	1.32917	1.40792	1.1743	1.04774	1.10296	0.898342	0.859091		0.995517	0.882998	1.19495	0.790601	0.511678	0.683858	0.713227	0.878909	0.692163
Cyclin-D1	0.975339	0.926575	0.954637	0.970567	0.96409	0.979811	0.948545	0.891978	0.858155		0.927199	1.00573	1.04515	1.14494	1.16582	1.08341	1.03956	1.04364	1.01367
Cyclin-D3	0.924616	1.02647	0.705162	0.809214	0.834258	1.00918	0.992633	0.656909	0.68942		0.932336	1.14893	0.8837	1.26877	1.23595	1.10207	1.07314	0.880462	0.899652
Cyclin-E1	0.768622	1.10052	0.754429	0.707769	0.6946	1.05253	1.02863	0.818438	0.822621		0.894345	1.18841	1.04748	0.816758	0.896553	0.974591	0.984984	0.911686	0.924409
Cyclophilin-F	1.15462	1.42683	1.28878	1.44719	1.27111	1.43609	1.39594	1.41956	1.2727		0.644998	0.700841	0.826658	0.750057	0.70395	0.751181	0.766457	0.765458	0.751993
D-a-Tubulin	1.00071	1.02612	1.00281	0.954262	0.933487	0.878957	0.989885	1.02278	1.05377		0.994045	1.01922	0.97736	1.00145	1.04762	1.04127	0.982674	0.949156	0.973661
DJ1	0.888583	0.934525	1.03432	0.911279	0.901962	1.02472	1.01396	1.05735	1.07395		0.943515	1.01614	1.01698	1.02234	0.975881	1.02806	1.0538	1.05636	1.03396
DM-Histone-H3	0.944032	0.99404	0.969197	1.01408	0.969127	0.907448	1.02907	0.898496	0.889602		0.979021	0.978154	0.982746	1.05163	1.10123	1.171	1.15037	1.21571	1.1501
DM-K9-Histone-H3	1.02976	0.962587	0.960263	1.0428	1.01336	0.923642	0.966139	0.970621	1.01875		1.04379	1.06182	0.967521	0.9656	0.980936	0.978052	0.980843	1.02099	0.996606
DUSP4	2.8085	1.63372	1.40731	3.00042	2.89438	1.43768	1.45209	1.52918	1.34733		0.650127	0.57405	0.60978	0.576193	0.673644	0.677323	0.681633	0.735361	0.740428
E-Cadherin	0.857832	0.945841	1.05291	0.923868	0.950584	0.908946	0.975485	1.05	0.89315		0.934543	1.04219	1.03827	0.857192	0.981732	1.11871	1.11397	1.30422	1.1294
E2F1	0.94014	0.995811	0.909893	0.871794	0.883506	1.02404	1.00594	1.05401	1.05691		1.1431	1.19102	1.37784	1.04272	0.979754	1.0055	0.929864	0.860359	0.943208
eEF2	1.06005	1.13794	1.06528	1.1306	1.07508	1.03757	1.09738	1.03417	1.00888		0.997684	0.941359	0.861846	0.682596	0.856707	0.894216	0.919697	0.824021	0.75246
eEF2K	0.914536	0.894355	0.769573	0.961854	0.900852	0.939634	0.957839	0.77516	0.758867		1.3163	1.19736	1.02731	1.23003	1.05533	1.12899	1.17517	0.948365	0.960376
EGFR	0.90517	1.01483	0.98395	0.952273	1.04407	0.958452	1.03933	1.03281	1.02129		0.885945	0.931494	0.937241	0.902159	0.907071	0.969007	0.951926	0.985876	0.971387
EGFR pY1173	1.02238	0.985665	0.966574	0.949438	1.04985	0.992002	1.03102	1.00048	1.03252		1.0002	0.996162	0.940281	1.03133	1.00699	1.00017	1.0127	1.05423	0.99762
eIF4E	0.830898	0.976597	0.867391	0.885698	0.836604	1.00677	1.0259	0.963278	1.01745		0.911427	1.14141	0.926502	1.11446	1.05636	0.934406	1.10844	0.998739	1.04502
eIF4E pS209	0.918662	0.929785	1.00113	0.974228	1.01226	1.11839	1.03999	0.906853	0.920737		0.882868	0.990296	0.994084	1.07844	1.12728	1.11772	1.16197	0.999367	1.13664
eIF4G	1.12496	0.993974	0.979127	1.12638	0.960044	0.956347	0.914876	0.760023	0.771313		1.18099	1.15873	1.12934	0.766429	1.05686	0.94387	0.965484	0.827196	0.853443
Elk1 pS383	1.05519	0.949734	1.07014	0.992034	1.01763	0.947572	1.00222	1.01862	1.03215		1.11604	1.06078	1.07651	0.949704	1.01716	1.04348	1	1.07381	1.03719
EMA	0.494132	0.479552	0.529912	0.444369	0.485272	0.42984	0.467787	0.414487	0.477797		1.61472	1.64956	1.61173	1.83456	2.19702	1.56384	1.61241	1.42783	1.37404
ENY2	0.972251	0.984486	0.94641	0.988315	1.00411	1.15998	1.20383	1.27151	1.47295		1.27304	1	1.02634	0.973175	0.862813	0.803702	0.817953	0.824878	0.936449
ER	0.944681	1.02469	1.04717	0.970754	1.01247	1.02789	1	0.983862	1.05663		1.06983	1.14924	1.43992	1.02952	1.09988	1.18978	1.18449	1.22112	1.17963
ER-a pS118	1.03714	0.978279	0.967142	0.970054	1.04778	0.997134	1.03305	1.02773	1.01663		1.04493	1.02921	1.04614	1.04759	0.969433	0.974994	0.927666	1.02931	1.04413
ERCC1	1.05023	0.953504	0.915893	1.14994	1.02558	0.942121	1.00765	1.06398	1.13911		1.31159	1.15574	1.40414	0.895844	1.16512	0.810149	0.876939	0.874393	0.92531
ERCC5	0.820486	0.900887	0.901409	0.861101	0.818254	0.900936	0.908782	0.818968	0.855136		1.41327	1.6513	1.4909	1.21179	1.47827	1.73183	1.82285	1.49223	1.49835
Ets-1	1.09375	1.11583	1.0714	1.0666	1.03202	1.01415	1.02328	0.999473	0.935568		0.804641	0.874169	0.63361	1.0824	1.06145	1.0703	1.06777	1.0251	1.04426
FAK pY397	0.886066	0.798717	0.813368	0.87281	0.825976	0.827514	0.792813	0.830431	0.83326		1.06427	1.09907	0.967095	1.67229	1.55191	1.25602	1.16571	1.25371	1.30583
FASN	0.924594	1.01224	1.02507	0.996785	0.974523	1.12135	1.14067	1.03708	0.979323		1.04925	1.0118	1.08517	0.42961	0.978903	0.935787	0.999359	0.933971	0.877737
FoxM1	1.30248	1.18052	1.12194	1.2606	1.09454	1.0144	1.05605	0.71012	0.715665		1.02829	0.950641	0.977246	0.844237	0.575315	0.781572	0.793957	0.818831	0.714698
FoxO3a	0.980008	0.987517	1.01418	1.0256	0.980109	1.01482	1.00068	1.02593	1.04037		0.995224	0.986983	0.979237	1.02729	1.04283	1.10044	1.10695	1.12352	1.11015
FRA-1	1.22791	1.06761	1.10816	1.23167	1.11917	0.920591	0.854166	0.941144	0.948613		0.838227	0.818019	0.767977	0.996087	1.03643	0.950445	0.961687	0.934669	0.894543
G6PD	0.960799	1.00416	1.01074	0.872896	0.97592	0.881305	0.954026	1.05631	1.07957		0.881503	0.957632	1.10608	1.13607	1.13277	1.05347	1.09762	1.08756	1.21588
Gab2	2.34253	1.90006	2.61047	2.32805	2.11447	1.68951	1.76526	1.92158	2.08487		0.401912	0.366523	0.377335	0.420694	0.401367	0.346118	0.344117	0.402638	0.424825
GAPDH	0.848549	1.29223	0.957119	0.982755	0.822972	1.14536	1.21127	1.22826	1.31295		1.10619	1.39288	1.55228	0.553397	0.878982	0.816777	1.03949	0.712925	0.814115
GATA3	1.01841	1.01176	0.976059	0.960193	0.970851	1.02613	0.982293	1.07543	1.05837		0.951806	0.964012	1.01908	0.973685	0.941489	0.932306	0.927074	0.93533	0.985001
GCLM	1.00298	1	1.0306	0.973193	1.02819	1.04055	1.01278	1.09128	1.04046		0.997391	0.975267	0.919966	1.02393	1.03436	1.04301	0.977071	0.996351	1.03851
GCN5L2	0.787117	0.710603	0.769517	0.761121	0.750679	0.675342	0.680868	0.662787	0.669202		1.64422	1.57385	1.57996	1.36531	1.51054	1.58503	1.64461	1.66795	1.67571
Glutamate-D1-2	0.999244	1.10438	1.108	1.00897	1.02799	1.04306	1.03428	1.06886	1.01574		0.750043	0.807083	0.862917	0.89667	0.863479	0.938007	0.903547	0.975701	0.920379
Glutaminase	1.01572	1.03628	0.944924	1.06596	1.08214	1.09617	1.08446	0.988278	0.985986		0.843717	0.844354	0.764329	0.95846	0.974376	0.96561	0.976153	0.957846	0.994207
Granzyme-B	1.05044	1.18455	1.20278	1.21713	1.13477	1.09169	1.15791	1.2255	1.25258		0.769544	0.77183	0.88742	0.74129	0.802756	0.775398	0.825927	0.906842	0.85121
GSK-3a-b	0.89749	0.983964	0.902139	0.937069	0.910627	1.01603	1.0673	1.06621	1.193		1.64132	2.02145	2.19779	0.945117	0.926005	0.898615	1.0065	0.906708	0.957092
Gys	0.679431	0.698002	0.766977	0.64512	0.680945	0.79012	0.830271	0.849845	0.815617		1.22984	1.17002	1.19735	1.2941	1.29611	1.29867	1.37409	1.22867	1.2354
Gys pS641	0.918268	0.96922	1.09801	0.929299	0.945657	0.888088	0.995829	1.00589	0.994344		1.34912	1.32392	1.36791	0.977942	1.215	1.31996	1.41787	1.47354	1.37926
H2AX pS140	0.945659	0.957905	1.04719	0.953666	1.01354	1.01839	1.02139	1.04986	1.11165		1.01289	1.18298	1.32159	1.03808	1.0618	1.12788	1.10873	1.70661	1.35304
HER2	0.917274	0.952725	0.858589	0.843736	0.897011	0.889648	0.827529	0.81054	0.821958		1.13591	1.05193	1.16132	1.1556	1.55132	1.30121	1.30255	1.24064	1.28695
HER2 pY1248	1.08134	0.991201	0.866196	0.936042	0.948695	0.971692	0.989028	1.01075	0.964004		1.12445	1.06309	1.02683	1.05604	1.05062	1.0741	1.0226	1.05942	1.04706
HER3	1.1266	0.956353	1.01918	1.1122	1.02219	0.881655	0.988329	0.884885	0.88901		0.962559	0.95766	0.759097	1.10378	1.02501	1.07495	0.998606	0.961103	0.953064
HER3 pY1289	1.1883	1.15553	1.051	1.18321	1.21123	1.11805	1.16433	1.02381	1.03571		0.854101	0.941627	0.886679	0.928957	0.871332	0.91017	0.976964	0.893514	0.921577
Heregulin	1.10888	1.03957	1.10133	1.08801	1.06231	1.00762	1.04198	1.04396	1.00637		0.855546	0.87793	0.88747	0.806228	0.873161	0.866864	0.8499	0.87299	0.905636
HES1	0.836008	0.748226	0.813771	0.896185	0.770257	0.707018	0.705604	0.736077	0.700232		1.0601	1.14598	1.11662	1.21928	1.29256	1.16042	1.17949	1.00296	1.08546
Hexokinase-II	1.31137	1.15524	1.09831	1.31904	1.33554	1.1415	1.23391	1.25015	1.20962		0.846922	0.823812	0.838162	0.898194	0.833373	0.80871	0.752784	0.850511	0.844273
Hif-1-alpha	0.891815	0.90142	0.807744	0.744153	0.788734	0.82899	0.956012	1.0404	1.07467		1.21227	1.34547	1.57266	1.09362	1.04135	1.02773	1.05019	1.26232	1.02292
Histone-H3	0.980225	0.966864	0.998814	1.01926	1.06214	0.922221	0.99569	1.03244	0.994416		0.96675	1.01761	0.934056	0.849406	0.849939	0.972169	1.03901	1.5515	1.53132
HSP27	0.878191	0.997354	0.898547	0.841441	0.846972	0.973042	0.875528	0.951342	0.997031		1.23979	1.45133	1.49955	1.10723	1.29042	1.31149	1.17271	1.23385	1.27002
HSP27 pS82	0.879063	0.943538	0.945212	0.765156	0.837074	1.00909	0.996053	0.950476	1.0358		1.22357	1.35565	1.23371	1.13142	1.20072	1.3429	1.18359	1.16524	1.21626
HSP70	0.957299	0.966863	0.916129	0.845903	0.909283	1.03474	1.01698	0.908828	0.891873		1.06182	1.12338	1.11104	1.10922	1.03025	1.06428	1.00691	1.17378	1.13222
IGF1R pY1135 Y1136	0.964619	0.976109	0.936823	0.952043	0.961457	1.03491	1.0653	0.988867	0.989224		1	1.09792	1.02657	1.02501	1.0528	1.0743	1.05283	1.07758	1.0411
IGFBP2	0.933352	0.884067	0.961632	0.991488	0.955113	0.94304	0.949138	0.992475	0.92775		1.35517	1.18907	0.957053	1.63589	1.51647	1.11331	1.10129	0.890243	0.93358
IGFRb	0.854453	0.746727	0.73325	0.810041	0.813468	0.826066	0.803571	0.727953	0.708334		1.14735	1.2353	1.03579	1.30803	1.1904	1.23151	1.23714	1.05338	1.10766
INPP4b	1.05354	1.01013	0.993842	1.02233	1.05317	1.08426	1.06915	1.03926	1.07509		0.842407	0.938713	0.87499	0.843579	0.896711	0.921195	0.921843	0.930831	0.988785
IR-b	0.791527	1.02231	1.01026	0.751444	0.759317	1.06662	1.01811	1.02643	0.977288		0.913537	0.981124	0.958805	1.07284	0.933446	1.16129	1.12002	1.03906	0.986367
IRF-1	0.988606	1.01459	0.98852	1.01973	1.01186	0.919156	0.910915	0.939447	0.890976		0.92194	0.961299	0.954514	0.998298	1.00157	1.00868	1.01833	0.991214	0.947168
IRS1	0.930268	0.910069	1.07954	0.897999	0.954244	0.919803	0.926864	1.02396	1.02169		1.15939	1.24478	1.49692	1.00381	1.14323	1.12268	1.15911	1.35245	1.31622
Jagged1	1.05439	1.01789	1.00816	1.05415	1.09931	1.01957	1.03873	1.01472	1.0352		0.853852	0.858751	0.879394	0.896773	0.944392	0.893472	0.888581	0.91161	0.958291
Jak2	1	0.904866	0.945518	1.07116	0.980127	0.867185	0.931483	0.965536	0.953849		1.11955	1.07245	1.08191	1.02995	1.00892	1.07456	1.096	1.0507	1.05036
JNK2	0.954328	0.90698	0.884336	0.91071	0.958171	0.959327	0.974424	0.869012	0.886463		1.26261	1.28442	1.14922	1.15437	1.18883	1.21483	1.27689	1.27298	1.228
JNK pT183 Y185	0.985658	0.952352	1.04191	0.985867	1.01984	0.994078	1.05244	0.960447	1.0361		1.0056	0.985555	0.981429	0.964274	0.984923	1.07511	1.00759	1.00022	1.03496
LC3A-B	1.04709	1.04006	1.13848	1.04737	1.05162	1.08611	1.06076	1.0512	1.12226		0.795575	0.739618	0.659973	1.34591	0.891949	0.905973	0.915708	0.91652	0.913337
Lck	1.2799	1.19731	1.21073	1.23739	1.24158	1.21669	1.30294	1.26647	1.15934		0.698807	0.735937	0.705297	0.783989	0.780911	0.741927	0.761112	0.857633	0.817003
LDHA	0.751215	0.854196	0.809672	0.762825	0.790146	0.771902	0.882334	0.835031	0.815474		1.25179	1.23184	1.09002	1.25207	1.17033	1.18321	1.26265	1.17698	1.18765
LRP6 pS1490	1.05413	1.031	1.14636	1.10684	1.1178	1.01933	0.966413	0.945571	1.03405		0.843786	0.837313	0.820644	0.816056	0.910523	0.936984	0.892927	0.898704	0.921944
MAPK pT202 Y204	0.905879	0.889889	1.22485	0.966239	1.07081	0.92878	0.964648	1.26123	1.52756		1.03241	1.04959	0.937867	1.0082	0.813388	0.910853	0.875371	0.896016	0.874519
Mcl-1	0.971311	0.766505	0.647304	1.02761	0.920782	0.717799	0.686184	0.644339	0.673043		1.04751	1.0282	0.894126	1.12947	1	1.05591	1.03462	0.889802	0.900917
MCT4	1.01691	1.00559	0.984785	1.00338	0.978928	1.04887	1.03609	1.04035	1.00305		0.957379	0.955806	0.849463	1.15984	1.28926	1.17029	1.14598	1.05143	1.06839
MDM2 pS166	1.19795	0.987916	1.02246	1.05753	1.00414	0.946025	0.950594	0.870764	0.855491		0.990145	0.9672	0.85726	0.922142	1.12978	0.995129	0.980479	0.925532	0.914117
MEK1	1.00357	1.13291	1.08545	1.01087	1.04266	1.09662	1.14833	1.06664	1.03405		0.939614	0.96725	0.955016	0.900019	0.876924	0.916945	0.9068	0.897658	0.872267
MEK1 pS217 S221	1.07197	1.08023	1.23052	1.11522	1.08677	1.11563	1.22645	1.32448	1.3219		0.842412	0.874452	0.818106	0.832231	0.795174	0.857598	0.831853	0.820278	0.834428
MERIT40 pS29	1.0299	0.859223	0.85189	0.984318	1.00737	0.834767	0.785324	0.758883	0.80042		1.33343	1.25402	1.04192	1.1981	1.3492	1.18888	1.2213	1.01543	0.940063
Merlin	0.903879	0.892072	0.827334	0.918355	0.870155	0.832549	0.90685	0.837524	0.81748		1.19033	1.23961	1.12949	1.19531	1.17972	1.17133	1.22515	1.16972	1.17669
MIF	0.97895	1.05357	1.02295	1.00393	1.00623	1.0612	1.03942	1.05384	0.965362		0.824647	0.843807	0.881967	1.03432	1.07744	1.01328	1.05128	1.00152	1.02528
MIG6	1.02016	0.997317	1.01862	1.02415	0.947163	0.935937	0.919166	0.915688	0.761881		0.993693	1.01336	1.24495	0.985201	0.936236	0.983813	0.986221	0.909268	0.932333
MMP2	1.03509	0.994412	0.972391	0.985948	1.0653	0.97896	1.01058	1.01003	1.01932		1.11219	1.10603	1.05997	1.06897	1.10456	1.11854	1.10177	1.16228	1.17947
Mnk1	1.14531	1.0198	0.79406	1.03507	1.12647	1.02206	0.968689	0.781021	0.803581		0.938033	0.956313	0.764443	1.0494	1.01096	0.956138	0.963546	0.872039	0.869979
MSH6	1.04546	1.05184	1.02351	1.10144	1.02942	1.10039	1.16348	1.01149	1.02113		1.04672	0.950866	0.972852	0.869756	0.832258	0.944187	0.975085	0.944506	0.941006
MSI2	0.868234	1.02078	1.096	1.06381	1.07683	1.01951	1.02544	1.18494	1.18443		0.675931	0.746477	0.737728	0.77052	0.92549	0.917511	0.857986	0.907218	0.96021
mTOR	1.04588	1.04188	1.10112	1.08231	0.931561	1.0259	1.03258	1	1.01145		0.875735	0.955256	0.96452	0.97135	0.887726	0.962385	1.02669	0.960764	0.941621
mTOR pS2448	1.16574	1.08673	1.18655	1.24449	1.14667	1.0558	1.027	0.977257	1.03784		0.936079	0.894765	0.853282	0.864674	0.841586	0.903904	0.867923	0.834771	0.835761
Myosin-11	0.938916	0.953682	0.949898	0.982087	1.00718	1.0657	0.984949	1.07064	1.02376		1.11463	1.02551	1.13874	1.01971	1.10199	1.15169	1.17598	1.25425	1.22831
Myosin-IIa pS1943	0.856078	0.962515	1.02955	0.969763	0.83381	0.697741	0.880513	0.902493	0.894323		1.2025	1.16298	1.09199	1.12873	1.20826	1.11572	1.3845	1.05592	1.10676
Myt1	1.15838	0.969453	0.834738	0.95914	0.993177	0.956959	0.972151	0.78115	0.739204		1.11275	0.927537	1.05476	1.1699	0.929753	0.983932	0.996835	1.04856	0.953202
N-Ras	0.913897	0.984839	0.956652	0.980619	0.976876	1	1.04397	1.09592	1.18078		1.18544	1.21504	1.59865	0.947734	0.931205	0.990362	0.942545	1.00248	0.903754
NAPSIN-A	0.973299	0.983636	1	1.06019	1.03983	1.01142	1.00939	0.994654	1.0421		1.01407	0.975234	0.932075	0.994555	0.978845	1.05321	1.05515	1.05862	1.01996
NDRG1 pT346	1.51093	1.244	1.94882	2.34825	1.72784	0.791368	0.796699	0.514249	0.53979		1.23917	0.958028	1.46519	1.10336	0.859172	0.758919	0.685677	1.18848	0.726862
NDUFB4	1.05357	0.971403	0.929029	1.05536	0.982691	0.963271	0.913981	0.908219	1.01024		1.30402	1.20061	1.41151	0.98206	0.996532	0.937089	0.949743	1.026	1.00581
Notch1	1.06788	0.929367	1.04296	1.00649	0.93961	0.840867	0.834559	0.817022	0.822165		1.06167	1.16839	1.11729	0.932837	1.32702	1.01958	0.996398	0.93329	1.0344
Notch3	0.957795	0.928752	1.04774	0.940084	0.858754	0.983793	0.982822	0.994044	1.00513		1.01437	1.00038	1.03508	1.11002	1.07045	1.06424	1.01352	0.988382	0.982059
2018-10-04	1.01556	1.0721	0.973553	0.942827	1.06918	1.00145	0.953528	0.989536	0.940731		0.949549	0.948219	0.935558	0.93183	1.11138	1.06351	1.04482	1.02711	1.08214
P-Cadherin	0.946122	0.914287	0.903547	0.900553	1.05343	0.993533	0.965426	0.996563	1.06777		1.13355	1.21712	1.14907	1.09015	1.14156	1.16944	1.15339	1.19858	1.21379
p16INK4a	0.790609	0.855902	0.885782	0.89988	0.816885	0.903954	1.00102	1.0704	1.15104		1.41951	1.16917	1.62259	0.877103	1.03127	1.0862	1.27542	1.15665	1.58708
p21	0.927105	0.972848	0.923429	0.918522	0.857438	0.979558	1.00123	0.931799	0.886661		0.953931	1.47349	0.874522	1.97607	2.47748	1.80202	1.82447	1.25744	1.45639
p27-Kip-1	0.994748	0.983389	0.991224	1.00001	1.06204	0.964002	1.01568	1.02272	1.04092		1.00992	1.01144	0.988765	1.00396	0.988259	1.01095	0.999491	1.05388	1.05193
p27 pT198	1.03711	0.939861	0.985401	1.04936	1.04273	0.97183	0.916967	0.854106	0.888283		0.993035	0.972561	0.91688	1.07061	1.06139	1.02105	0.987538	0.976328	0.965105
p38-MAPK	1.05534	0.953198	0.96006	1.03275	0.998467	0.958284	1.03298	1.05468	1.01707		1.05389	0.964558	0.883579	0.986722	0.958757	0.968124	0.969577	0.907883	0.863731
p38 pT180 Y182	0.800888	0.890211	0.736092	0.88931	0.955995	1.01575	1.08859	0.841768	0.874681		1.19433	1.03044	0.909599	1.05297	0.990156	0.983991	0.996133	0.919792	0.949459
p44-42-MAPK	0.88533	1.01987	0.914188	0.98163	0.947448	1.01284	1.02451	0.981909	0.889354		0.955569	0.9725	0.856439	1.03512	0.970968	0.97043	0.976416	0.909562	0.922727
p70-S6K1	0.875359	1.07974	1.08205	0.915102	0.768745	0.853261	0.873336	1.07947	1.0825		1.70427	2.30248	4.14651	0.911652	0.914265	0.913124	0.987419	0.865908	0.767162
p70-S6K pT389	1.77807	1.1958	1.61511	1.49977	1.50309	1.07984	1.04456	1.07388	1.17283		0.979491	0.784007	0.919865	0.839133	0.726969	0.719703	0.717364	0.795434	0.741771
p90RSK pT573	1.58583	1.76011	1.32798	1.68907	1.74976	1.97304	2.01864	1.04617	1.2166		0.90841	0.921388	0.761601	0.932153	0.809353	0.908481	0.796505	0.801023	0.691811
PAI-1	1.00912	1.12404	0.906216	1.08024	1.03456	1.12346	0.95952	0.9591	1		0.878923	0.978326	0.959201	1.00865	1.05612	0.996074	0.969085	0.847638	0.871275
PAICS	1.0065	1.00953	0.975315	0.978625	0.96942	1.01508	1.03116	1.02529	1.00289		1.0432	1.01748	0.991665	0.977184	0.947533	1.00906	1.01925	0.998142	0.954146
PAK1	1.0694	1.05058	0.977139	1.00823	0.997238	1.08507	0.991098	0.90226	0.914721		0.880125	0.879515	1.00836	0.916992	1.00068	1.05407	1.04813	1.12963	1.18583
PAK4	1.01583	1.00631	0.991085	1.01514	1.03412	1.0037	0.983025	0.960294	0.960918		0.938567	0.977494	0.908404	0.995475	1.02073	1.03158	1.02834	1.01296	1.021
PAR	0.326416	1.14491	0.490316	1.01081	1.05872	1.47839	0.94828	1.26326	0.972098		0.154231	0.513903	0.352767	0.221281	0.895326	1.07284	1.14732	0.832026	1.50076
PARP1	0.957841	0.958006	1.05617	1.01866	0.853802	0.92934	0.933588	0.856377	0.890812		0.972488	0.959314	1.13483	1.36045	1.04658	1.26044	1.19651	1.07644	1.03349
PAX8	1.00622	1.0279	1.03074	1.02193	1.0393	1.05695	0.990441	0.991911	0.943128		0.98378	0.830864	0.858867	1.07376	1.15871	1.24174	1.13908	1.17622	1.2404
Paxillin	0.910677	0.977814	1.03551	0.952229	0.9255	0.814619	0.953918	0.905633	0.900109		1.88413	1.95878	1.81455	1.1226	1.71453	1.78362	1.88621	1.64856	1.74909
PCNA	1.05787	1.11958	0.974564	1.02853	0.942246	1.13058	0.991055	0.946366	0.991453		0.985542	1.1882	1.08796	0.730789	0.932301	0.92356	0.979258	0.816285	0.862361
PD-L1	1.01018	1.01325	1.0399	1.00818	1.04394	1.05507	1.0073	1.02746	1.06427		0.946714	1.00524	0.998552	1.06271	1.05509	1.06028	1.04769	1.0262	1.05451
Pdcd4	0.403656	0.424686	0.871328	0.433529	0.410692	0.441921	0.393878	0.674864	0.700147		1.08666	1.14057	1.31153	1.33485	1.48165	1.15066	1.06582	1.16708	1.27957
PDGFR-b	1.86568	1.76365	2.24004	1.89526	1.71893	2.10796	2.30658	2.70927	2.29258		0.163093	0.178892	0.229495	0.199454	0.162498	0.219279	0.223952	0.248526	0.331588
PDHK1	0.934521	1.0017	0.924241	0.917291	0.955628	1.04741	1.01178	0.997887	0.975042		0.975373	1.02329	0.993312	1.10252	1.07859	1.09814	1.04866	1.01505	1.04561
PDK1	1.06422	0.973695	0.939047	0.964455	1.04757	0.962345	0.990454	0.854965	0.869515		1.02706	1.03644	0.931226	1.00116	0.971347	0.951899	0.978807	0.95488	0.921766
PDK1 pS241	1.0657	1.0203	0.925534	1.12889	1.03899	0.980662	1.02618	0.889217	0.876231		0.996452	0.962946	0.917409	0.98175	1.00376	1	0.953736	0.914168	0.890845
PEA-15	1.17367	1.16418	1.09669	1.19451	1.14042	1.07674	1.12699	0.982068	1.02114		0.908571	0.916323	0.818634	0.979234	0.86613	0.895219	0.911076	0.904021	0.874288
PEA-15 pS116	0.984729	0.99401	0.972627	1.02553	1.00765	1.04805	0.983682	1.026	1.0547		1.02134	1.29084	1.33656	1.06013	1.05067	1.09593	1.03317	1.07107	1.0816
PI3K-p110-a	0.911577	0.955102	1.03573	0.934836	0.929757	0.985579	1.0171	1.05418	1.03822		0.955285	1.01327	1.14895	0.991691	0.951908	0.95608	0.995507	1.07201	1.01832
PI3K-p110-b	0.825111	0.843374	0.848836	0.87043	0.945832	0.888362	0.977083	1.09755	1.15902		1.22232	1.27619	1.49693	0.989355	1.25692	0.978408	1.03638	1.02836	1.02366
PI3K-p85	0.991022	1.00944	1.06113	0.981909	0.949803	0.993026	1.03126	1.16511	1.08112		0.905055	0.930833	0.927053	0.988875	0.936736	0.967683	0.980594	0.945283	0.945892
PKA-a	1.04808	1.04059	1.10418	1.13434	1.03478	0.998046	0.984271	1.00805	0.998591		0.888481	0.773822	0.752762	0.957508	0.940647	0.969122	1.00954	0.980399	1.04502
PKC-b-II pS660	0.775324	0.907039	0.667155	0.929964	0.861983	0.919418	1.02817	0.682233	0.64803		1.69267	1.85523	2.12823	1.09735	1.62562	1.62115	1.88356	1.69432	1.85767
PKC-delta pS664	0.949688	0.984065	0.939746	0.917275	0.974212	1.073	1.01389	1.05742	1.00709		0.951361	0.999974	0.965929	0.957925	0.991617	1.00539	0.996243	1.00731	1.05913
PKCa	1.26757	1.42771	1.28655	1.29589	1.32567	1.32041	1.38222	1.31049	1.35231		0.556299	0.622353	0.598058	0.642929	0.664667	0.70616	0.698978	0.732122	0.752535
PKM2	0.866643	1.01846	1.16235	0.938819	0.925224	1.07145	1.05248	1.14843	1.08359		0.88419	0.958161	0.693587	0.889436	0.9131	0.968084	1.00276	0.866933	0.820423
PLC-gamma2 pY759	1.03395	1.005	0.978715	1.00742	1.0076	1.04929	0.995741	1.04454	1.06408		0.988135	1.01867	1.03621	1.05474	1.06504	1.06091	0.997475	1.03929	1.05588
PLK1	1.44768	1.13471	1.06598	1.64613	1.30554	1.06949	1.0613	0.739983	0.726385		1.25848	0.963679	1.20175	0.936716	0.597233	0.806523	0.779521	0.81813	0.624817
PMS2	0.954052	0.977699	1.02506	0.948274	0.978736	1.09111	1.07572	1.00032	1.06278		0.978777	0.996197	1.00528	0.978096	0.993916	1.05985	1.06756	1.04752	1.0575
Porin	0.892926	1.00702	0.91656	0.921373	0.912836	0.97871	0.879504	1.04246	1.16566		1.28842	1.71325	1.80213	1.035	0.996824	1.05222	0.880589	1.18544	1.08873
PR	0.975021	0.952179	0.964992	0.940688	0.978119	1.01192	0.995978	1.07548	1.09217		1.13335	1.13844	1.07315	0.934919	0.975509	0.992581	0.950182	1.09076	1.04773
PRAS40	0.841816	1.04422	0.85053	0.91924	0.875164	0.991527	0.968609	1.04819	1.0606		1.01086	1.23312	1.30397	0.825715	0.935359	0.946	0.987971	0.868159	0.907796
PRAS40 pT246	1.2192	1.14696	1.15469	1.56942	1.22459	0.970954	0.999064	1.03893	1.24015		1.4037	1.16682	1.21075	0.851676	0.825668	0.720919	0.750055	0.748586	0.694677
PREX1	0.538007	0.853775	1.06511	0.646898	0.630451	0.8886	0.938756	1.2497	1.03678		0.875315	1.03012	1.4688	0.817801	0.950485	1.07317	1.06587	1.10962	1.18112
PTEN	0.890571	0.827063	1.01653	0.947883	0.933613	0.849293	0.898528	1.02465	0.92931		1.01355	0.98041	1.02761	1.15534	1.11693	1.06527	1.11226	1.13501	1.18951
Rab11-R-E	1.01211	1.01892	1.00903	1.00367	0.99897	0.957388	1.00595	0.975565	1.01806		0.970645	0.995266	0.947571	0.986559	0.901632	0.965002	0.965805	0.925466	0.946954
Rab25	1.00877	1.00736	1.00926	0.987755	1.02525	1.06733	1.03337	1.04338	1.04841		0.935619	0.944586	0.855817	0.958471	1.10012	1.13461	1.14619	1.16998	1.15104
Rad50	0.923167	0.902903	1.05959	0.991752	0.94584	0.993235	0.960356	1.04347	1.05058		1.14276	1.17954	1.37966	1.06233	1.04264	1.09828	1.12669	1.03652	1.11078
Rad51	1.24954	1.13361	1.02479	1.14951	1.18519	1.00204	1.10309	0.914845	0.923374		1.14862	0.950829	1.00056	0.883394	0.806134	0.905597	0.866777	0.909618	0.875729
Raptor	0.941724	0.999745	0.956192	1	1	0.977926	1.04116	1.00776	0.956391		0.904391	1.00548	0.961996	0.765349	0.922628	0.963052	0.950453	0.96846	0.98007
Rb-M-Q	1.04586	1.00545	1.03259	0.826473	0.762623	0.850078	0.869311	0.829751	0.87192		1.40021	1.22824	1.65674	1.09846	0.924035	0.983419	0.918651	0.982076	0.921064
RBM15	0.947611	1.03444	0.991085	1.01659	0.873098	0.96151	0.989624	0.864264	0.933687		0.872888	1.07016	1.03116	0.727364	0.977751	1.17886	1.09291	1.07021	1.02944
Rb pS807 S811	1.30476	1.21951	1.29982	1.14297	0.93029	1.09072	1.0636	0.815455	0.75716		1.51638	1.15937	1.67025	0.833732	0.401385	0.779259	0.77817	0.926058	0.715856
Rheb	0.986375	1.0597	1.06615	1.08782	0.933045	0.922194	0.904831	0.908364	0.906142		0.893012	0.983809	1.08105	0.934809	0.938035	0.956338	1.00914	0.803619	0.800704
Rictor	0.944251	0.992687	1.08088	0.937623	0.872266	0.876584	0.913815	0.958605	0.96585		1.01788	1.07082	1.1488	0.875797	1.04345	1.02562	1.04863	1.02796	1.03553
Rictor pT1135	1.26352	1.15673	1.27462	1.21187	1.15651	1.03532	1.0346	1.0913	1.07356		0.870142	0.889037	0.890958	0.900512	0.770901	0.874986	0.850412	0.856197	0.82696
RIP	1.00292	0.946794	0.976072	0.971458	0.937673	0.874786	0.879627	0.873887	0.87973		1.06557	1.00488	0.980189	1.14414	1.09759	1.01923	1.03723	1	1.00299
Rock-1	1.02622	1.05842	0.997185	0.954427	1.07438	1.01232	1.0212	0.98928	0.976007		0.910913	1.05909	1.08096	0.955116	1.07007	0.904647	0.93307	0.901192	0.923959
RPA32 pS4 S8	1.12274	1.03286	1.07851	1.10924	1.03452	0.913079	0.891201	0.76379	0.790635		0.834331	0.904	0.94548	0.977085	0.861342	1.04592	1.0523	1.02384	1.02285
RSK	0.862064	1.00735	0.620202	0.844389	0.92732	1.07473	1.11001	0.651496	0.667525		1.14924	1.33284	0.851591	1.20069	1.19359	1.22167	1.21885	0.829906	0.844312
S6 pS235 S236	2.68906	1.53524	1.25566	2.80772	2.35807	1.19105	1.12633	0.915995	0.913489		1.70454	0.856279	0.735812	1.3175	0.842697	0.594854	0.609232	0.602347	0.434531
S6 pS240 S244	1.9946	1.48948	1.40215	2.27374	1.82244	1.19301	1.31722	0.978121	0.973176		1.57615	0.730621	0.709337	1.25543	0.750299	0.562911	0.595362	0.665075	0.453416
SCD	0.840402	1.00431	0.885203	0.950262	0.990543	0.911819	1.05356	1.04525	1.04675		1.81384	1.24886	1.84346	1.07192	0.914454	0.940904	0.923542	0.834325	0.905094
SDHA	0.785992	0.903937	0.888944	0.77662	0.871857	1.04425	1.01373	1.05758	1.05047		1.00726	1.01356	0.966918	1	1.06884	1.15272	1.00494	1.114	1.15617
SF2	0.943723	0.960163	0.95617	1.00225	0.926192	1.04354	0.908483	0.921595	0.93511		1.05095	1.11309	1.05536	1.10461	1.11746	1.12734	1.10989	0.992564	1.09216
Shc pY317	1.05995	1.00181	1.02797	1.00995	1.05174	1.01465	0.990306	1.01622	0.998223		1.16003	1.10554	1.08029	1.01512	1.28981	1.18417	1.15362	1.13226	1.14622
SHP-2 pY542	1.24088	1.01461	1.10643	0.898861	0.977897	0.918226	0.921635	0.833352	0.947483		0.902983	0.924791	0.866851	0.899963	0.889744	0.967243	0.9103	0.938583	0.929707
SLC1A5	1.36438	1.15918	1.321	1.50444	1.55267	1.16186	1.28573	1.16071	1.11607		0.878124	0.726045	0.698958	0.730921	0.741347	0.733854	0.778977	0.804717	0.760579
Smac-M-Q	1.1104	1.07707	1.16288	1.18775	1.19969	1.1457	0.158451	1.14545	1.10088		0.763101	0.791447	0.892628	0.805603	0.794537	0.800065	0.836197	0.903241	0.899111
Smad1	1.00216	0.955482	1.00333	0.912045	0.972048	0.943397	0.984156	1.05127	1.04683		1.04567	1.09283	1.10722	1.08218	1.00692	1.02585	1.04061	1.09649	1.13832
Smad3	1.0436	0.961758	1.0209	1.03507	1.01522	0.909176	0.954633	0.984492	0.961352		1.01825	0.983058	0.955055	0.928762	0.940074	0.96157	0.93482	0.948368	0.947566
Smad4	1.06114	1.15936	0.984346	0.992298	0.966928	0.946747	0.945824	1.0409	1.12228		1.17349	1.22714	1.40134	0.958756	0.964452	0.916035	0.909913	0.897506	1.0321
Snail-M-Q	1.03299	1.22468	0.951812	1.04782	1.01277	1.01559	1.03844	0.906984	0.922887		1.00599	1.36661	1.33786	1.00653	0.909889	0.9231	0.921848	0.938686	0.882028
SOD1	0.940023	0.973045	0.999531	0.917438	0.941179	0.982814	1.00194	1.06947	1.05706		0.938668	1.14846	1.14589	1.03139	1.04284	1.06324	0.999799	1.08124	0.981275
SOD2	0.852839	0.99794	0.960813	1.01506	1.02524	1.21756	1.25147	1.24188	1.1895		0.938986	0.933689	0.847206	0.809131	0.870179	1.00395	1.09724	1.04755	1.08826
Sox2	2.28498	2.13821	2.25448	2.60995	2.39711	2.24493	2.2296	2.2293	1.8215		0.367093	0.343436	0.345916	0.382589	0.418443	0.437969	0.442301	0.426946	0.435743
Src	0.797608	1.04638	0.876328	0.832009	0.783796	0.917771	0.941503	0.970904	0.924876		0.969485	1.06494	1.24144	1.0541	1.04103	0.993992	0.971771	0.993085	0.991178
Src pY416	0.952708	0.983167	1.06655	1.00395	1.14285	1.01503	1.02798	1.08136	0.979602		1.23653	0.871483	1	0.954044	0.902201	0.846399	0.86085	0.880347	0.977259
Src pY527	0.802109	0.833834	0.834562	0.889514	0.794912	0.893548	0.862099	0.816466	0.904172		1.26523	1.21806	1.14023	1.2265	1.34452	1.19775	1.24064	1.17568	1.11374
Stat3	0.766727	0.846928	0.865755	0.911366	0.808896	0.846692	0.895262	0.899146	0.808808		1.31597	1.12669	1.13079	1.20287	1.39159	1.18975	1.26303	1.12767	1.17219
Stat3 pY705	0.617232	0.77499	0.705539	0.668217	0.736905	0.800923	0.785338	0.770889	0.829669		1.41808	1.96984	1.39768	1.34824	1.50279	1.50498	1.48887	1.4893	1.6718
Stat5a	1.05607	0.989404	1.23104	1.11794	1.01355	0.994973	0.996185	1.11757	1.10346		0.909988	0.91131	1.00295	0.884189	0.899403	0.920645	0.962237	1.01032	0.990505
Stathmin-1	1.00938	0.982961	1.06102	1.01081	1.05545	1.03593	1.0324	1.11283	1.14898		1.04551	0.942822	0.92015	1.03819	0.904746	0.904906	0.920415	1.01525	0.969714
Tau	0.802985	0.876307	0.746584	0.77253	0.819935	0.943514	0.783108	0.78776	0.789038		1.10368	1.21042	1.03177	1.23843	1.28065	1.7737	1.82171	1.1728	1.20393
TAZ	1.42289	1.36511	1.30332	1.43128	1.30286	1.17692	1.15273	1.13892	1.18301		0.942203	0.696877	0.664143	0.836479	0.841032	0.640104	0.714836	0.652253	0.633343
TFAM	0.955165	0.980349	0.973028	1.03504	1.05329	1.06034	1.01619	1.0499	1.07355		0.880216	0.892337	0.93559	0.997527	0.891195	0.981659	0.95594	1.06684	1.04361
TFRC	1.24709	1.35859	1.07223	1.41899	1.44025	1.28061	1.45644	1.1176	1.14678		0.967707	0.817764	0.757828	0.950179	0.820431	0.835197	0.815115	0.79901	0.768258
TIGAR	0.931058	0.989663	0.960856	1.02598	0.984017	0.929037	1.01695	1.01497	1.00691		1.02545	1.20268	1.08645	1.03669	1.10663	1.14096	1.17251	1.09157	1.05569
Transglutaminase	0.990885	0.990429	0.908367	0.906771	0.938217	0.976034	1.01941	1.05185	1.11188		1.21427	1.36238	1.38988	1.00633	1.07398	1.10993	1.10212	1.01769	1.00838
TRIM25	0.873159	1.09098	1.03725	0.997489	0.819283	0.994638	0.840446	0.886226	0.826124		0.907605	0.980028	0.880495	1.04758	1.35728	1.37541	1.3849	0.960282	1.01501
TSC1	0.92955	1.02105	1.06905	1.0064	0.978309	1.02716	1.0904	1.04852	1.09529		0.831215	0.993284	1.00587	0.819437	0.881885	0.87495	1.00595	0.947423	0.981215
TTF1	1.07368	1.02974	0.994633	1.02048	1.05614	0.972467	1.06338	0.938109	0.984513		1.00784	0.936664	0.934303	0.913419	0.880165	0.917961	0.863524	0.937156	0.909393
Tuberin	1.03757	1.02745	0.960571	1.02173	0.966681	1.05449	1.00349	0.944596	0.963334		1.04316	0.988098	0.935548	0.954195	1.05126	0.992638	0.976071	0.931554	0.906236
Tuberin pT1462	0.869094	1.00022	1.00272	0.923006	0.920177	0.98955	1.03026	1.08395	1.068		0.890812	0.978584	0.90121	0.862285	0.895137	1.05531	1.00021	1.02175	1.01071
TUFM	1.05749	1.01387	1.00374	1.00734	1.02365	1.00198	0.982667	0.983887	1.31265		0.98412	0.910877	0.897743	1.06552	1.03513	1.02362	0.986525	0.999189	1.03257
Tyro3	1.24077	1.10459	0.909056	1.02644	1.06573	1.02069	1.03019	0.898724	0.909514		0.939846	0.992528	0.797602	0.950997	0.888774	0.930532	0.928834	0.871608	0.856328
UBAC1	1.22456	1.15589	1.14301	1.21892	1.13144	1.16374	1.25669	1.06146	0.951078		0.81983	0.796404	0.782191	0.819177	0.762429	0.816328	0.835538	0.876171	0.824596
Ubq-Histone-H2B	0.838178	0.864469	0.896997	0.877789	1.16001	0.968789	1.01629	1.12867	1.18449		1.36119	1.32834	1.51501	0.911947	0.949963	0.888635	0.877575	0.902436	0.928315
ULK1 pS757	1.01091	0.915791	1.00461	0.963539	0.920392	0.887104	0.875973	0.900682	0.965228		1.46758	1.03186	1.05009	1.14646	1.29107	1.0935	1.04145	0.961395	1.00029
VASP	1.12621	1.17625	1.1579	1.10659	1.17904	1.23927	1.22792	1.33318	1.27695		0.770515	0.78831	0.79245	0.841875	0.802644	0.814147	0.77921	0.781135	0.812562
VEGFR-2	0.905545	0.951704	1.04587	0.930646	0.948266	0.973164	0.965855	1.06936	1.02774		0.97498	1.06216	0.863654	0.890553	1.09039	1.14539	1.14445	1.04667	1.07565
VHL-EPPK1-M-E	0.524975	0.915726	0.995928	0.667701	0.634323	0.886209	0.879891	1.06633	1.08896		1.52591	2.44249	2.0108	1.06634	2.25018	1.56052	1.62676	1.08222	1.33103
Wee1	1.29575	1.09414	0.982199	1.08236	1.04727	0.915645	0.869982	0.75534	0.774631		1.30044	0.960481	1.20308	0.978229	0.804516	0.931698	0.90337	1.02793	0.935809
Wee1 pS642	1.13261	0.982989	1.04038	0.964551	0.965352	0.892143	0.942093	0.815099	0.843475		1.29958	1.10137	1.41982	1.11823	0.814371	0.950478	0.890759	1.08179	0.934705
WIPI1	1.03472	1.02487	1.01577	1.09416	1.01549	1.07448	0.965723	1.02407	1.01708		1.02003	0.930099	0.945827	1.01177	1.38556	1.15687	1.1821	1.09787	1.17645
WIPI2	0.890393	0.967056	1.10787	0.922544	0.914707	0.971912	0.940256	1.17631	1.14864		0.915681	0.923588	0.937182	1.01545	1.15704	0.992404	1.01427	1.07372	1.08071
XPA	1.11611	1.09446	0.916967	1.2087	1.0218	0.946868	0.96479	0.907334	0.878095		1.08927	0.99183	1.10441	0.883311	1.10247	0.850927	0.961364	0.858451	0.873495
XPF	1.02189	1.0275	0.975559	1.0603	1.03746	1.03025	1.00467	1.01775	1.16261		1.20919	1.34882	1.43872	0.96715	1.00362	0.867744	0.897302	0.923106	0.925683
XRCC1	0.90697	0.896313	0.855969	0.853581	0.893677	0.864519	0.90856	0.897895	0.886744		1.17069	1.13898	1.21501	1.21675	1.16255	1.17167	1.18932	1.26438	1.23528
YAP-R-E	1.01188	0.958218	1.28279	1.31347	1.36294	1.13073	1.00016	1.04784	0.905192		0.696072	0.625143	0.616865	0.898912	0.890606	0.937449	0.937799	1.02628	0.995192
YAP pS127-R-E	1.06305	0.998401	1.2196	1.10687	1.0782	1.02775	0.970417	1.23812	1.23788		0.899377	0.897089	0.96675	0.812571	0.77946	0.884169	0.890081	0.934812	0.910641
YB1 pS102	1.35459	1.18519	1.06208	1.37435	1.35451	1.08565	1.15654	0.867948	0.921921		0.931545	0.885424	0.804603	0.907133	0.895246	0.914421	0.903986	0.896155	0.867559
ZAP-70	0.955076	1.00957	1.05332	1.0382	1.04954	0.862587	0.964121	0.997841	0.934718		0.906938	0.933175	0.942603	1.0881	1.0445	1.05426	1.03674	1.10409	1.11667
